# Supplementary material
Source: publisher figshare collection journal article supplement (https://acs.figshare.com/ndownloader/files/4035556)
Supplement: Supplementary file 1 [file 4035556]

**Supporting Information**

# Handheld Low-Temperature Plasma Probe for Portable “Point-and-Shoot” Ambient Mass Spectrometry

*Joshua S. Wiley, Jacob T. Shelley,<sup>†</sup> and R. Graham Cooks\**

Department of Chemistry and Center for Analytical Instrumentation Development (CAID),  
Purdue University, 560 Oval Drive, West Lafayette, IN 47907, USA

<sup>†</sup> Current address: Institute for Inorganic and Analytical Chemistry, University of Münster,  
Corrensstr. 28, Münster 48149 Germany

\*To whom correspondence should be addressed. Professor R. Graham Cooks, Department of  
Chemistry and Center for Analytical Instrumentation Development (CAID), Purdue University,

560 Oval Drive, West Lafayette, IN 47907. Telephone: (765) 494-5262. Fax: (765) 494-9421.

Email: [cooks@purdue.edu](mailto:cooks@purdue.edu)

**Description:** Contains two figures: one of handheld LTP mass spectra of a pharmaceutical tablet and the second of a handheld LTP spectrum acquired using the Mini 10.5 MS

**RESULTS AND DISCUSSION SECTION (supporting information)**

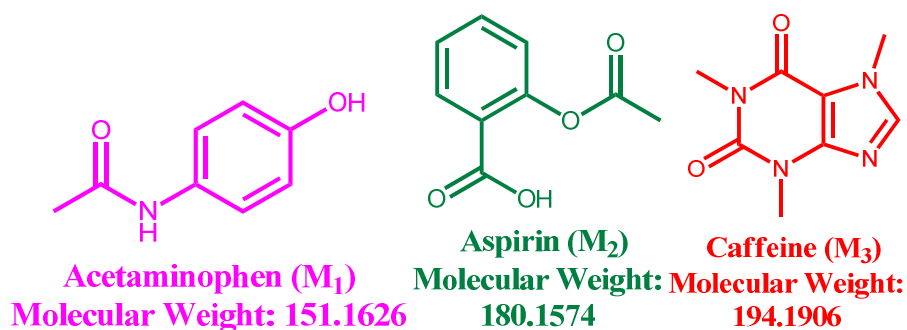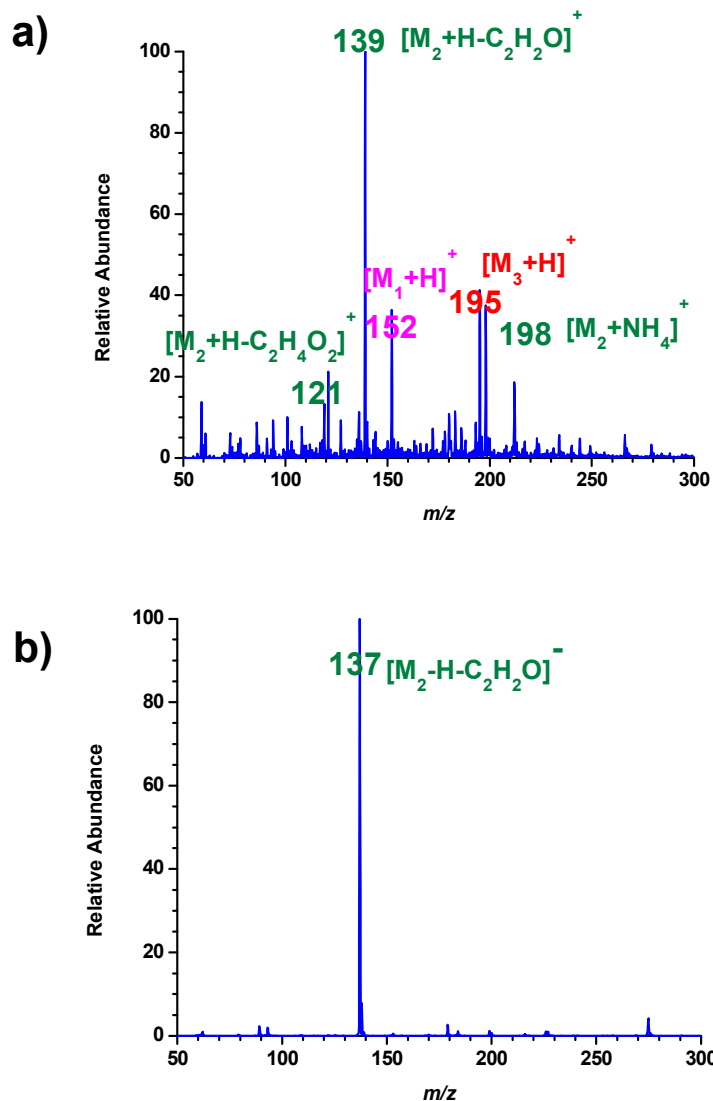

**Figure S1.** Direct handheld LTP-MS analysis of a headache relief tablet on the Thermo LTQ in (a) positive ion and (b) negative ion mode. Peaks labeled in magenta, green and red are related to acetaminophen, aspirin and caffeine respectively. Both spectra were acquired with a Thermo LTQ.

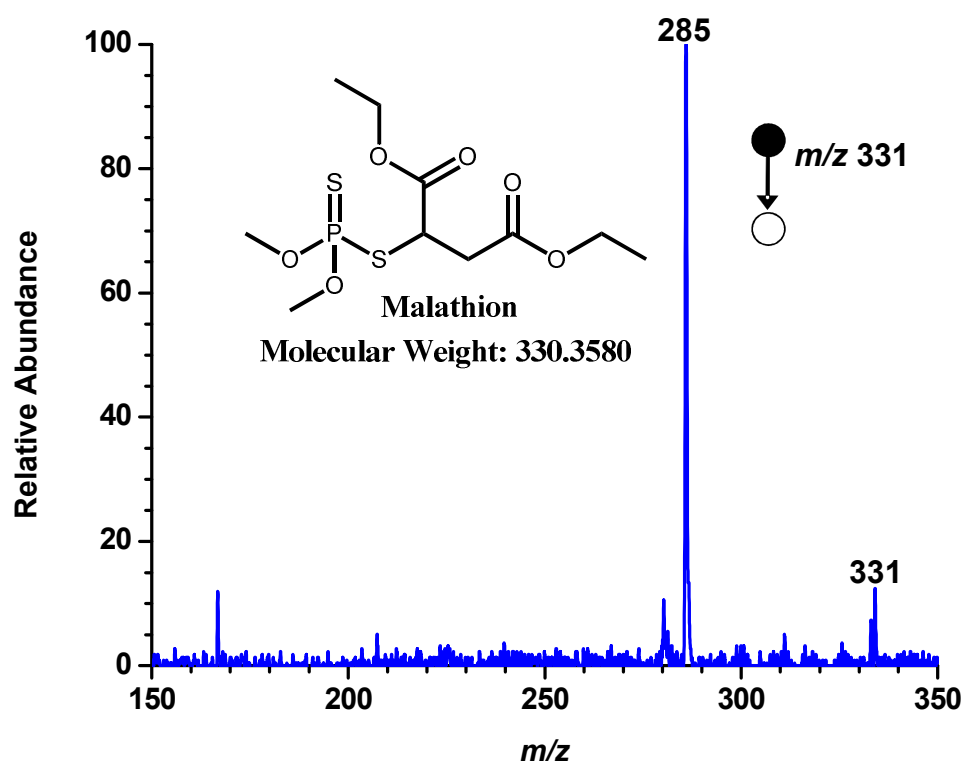

**Figure S2.** Handheld LTP MS/MS spectrum of 1.2 ng malathion using the Mini 10.5 MS.
